# Supplementary material
Source: Springer Nature journal article supplement (https://www.springermedizin.de/resource/supplementary/13098_2013_312_MOESM2_ESM.pdf/9671064)

### Odds Ratios (95% Confidence Intervals)

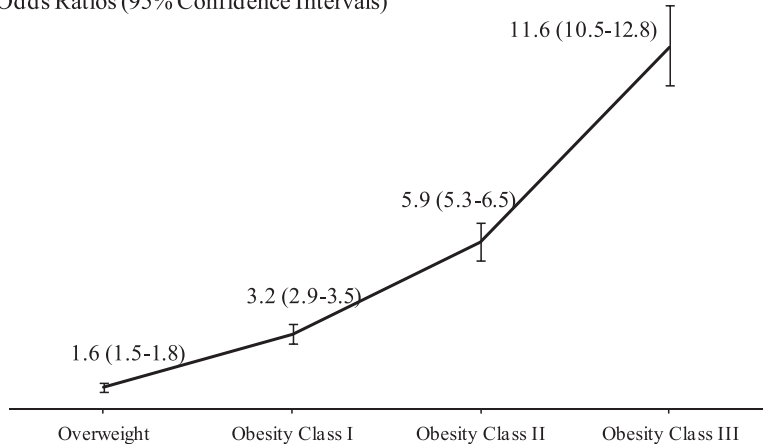

### Relative Risks (95% Confidence Intervals)

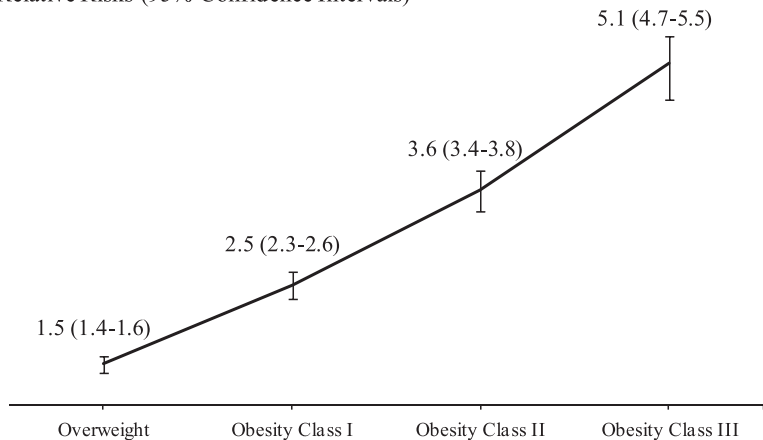

Supplement: MOESM2 [file 9671064]
